# Supplementary material
Source: HighWire-hosted journal article supplement (http://www.qdcxjkg.com/highwire/filestream/126495/field_highwire_adjunct_files/2/ERJ-00937-2015_Figure_S3.pdf)

**A**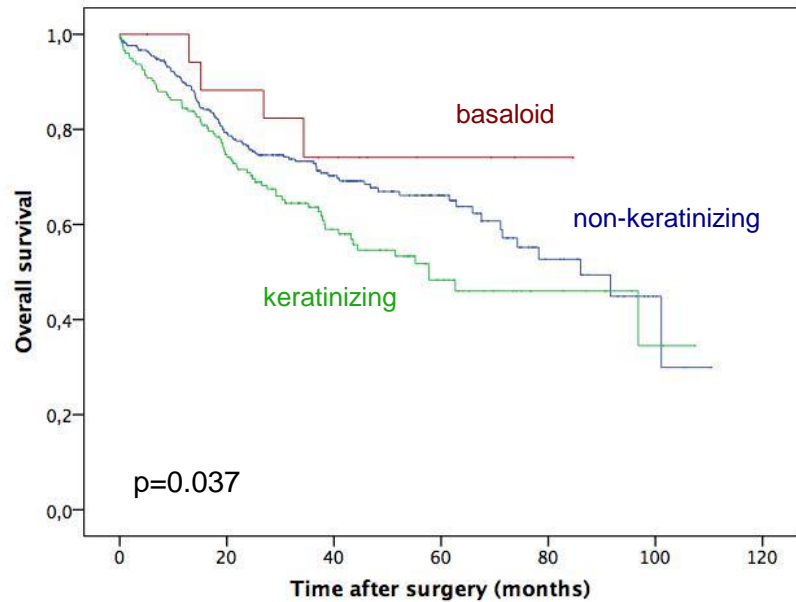**B**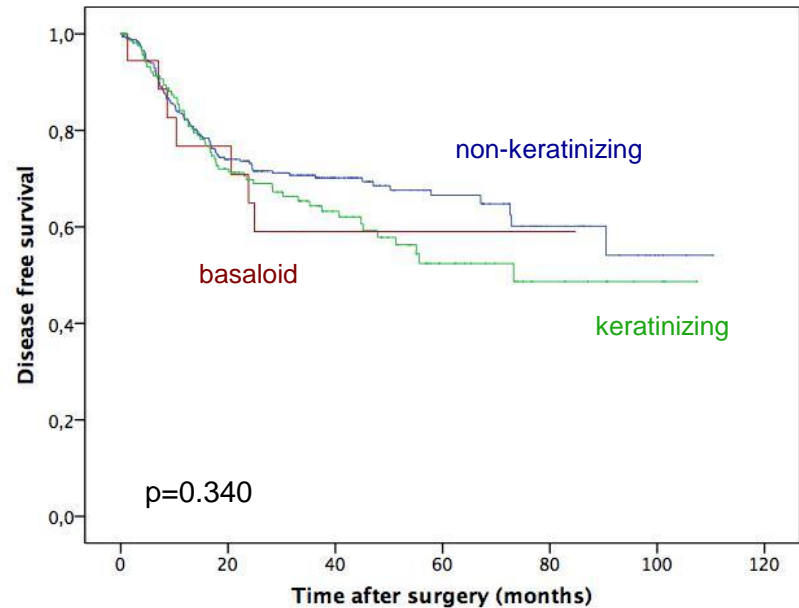

Supplement: ERJ-00937-2015_Figure_S3.pdf [file ERJ-00937-2015_Figure_S3.pdf]
